# Supplementary material
Source: PubMed Central journal article supplement (PMC2393746)

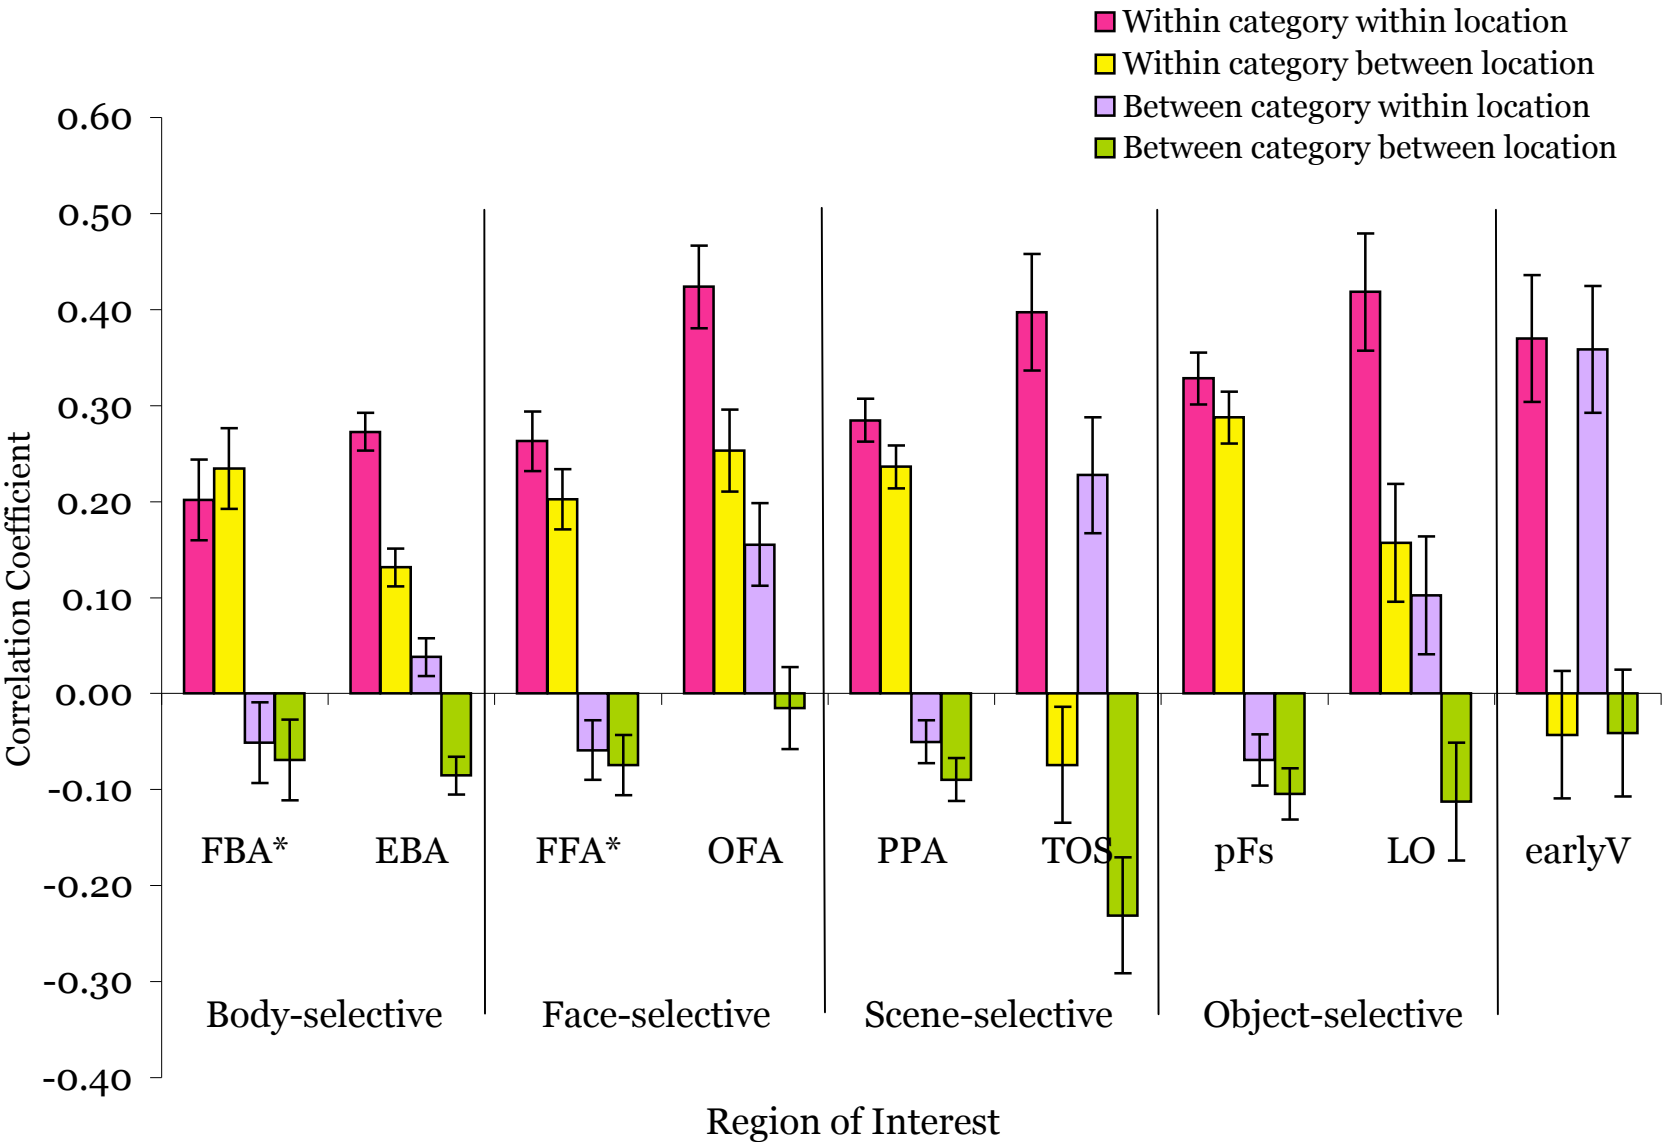

Supplement: pnas_0800431105_1.pdf [file pnas_0800431105_1.pdf]

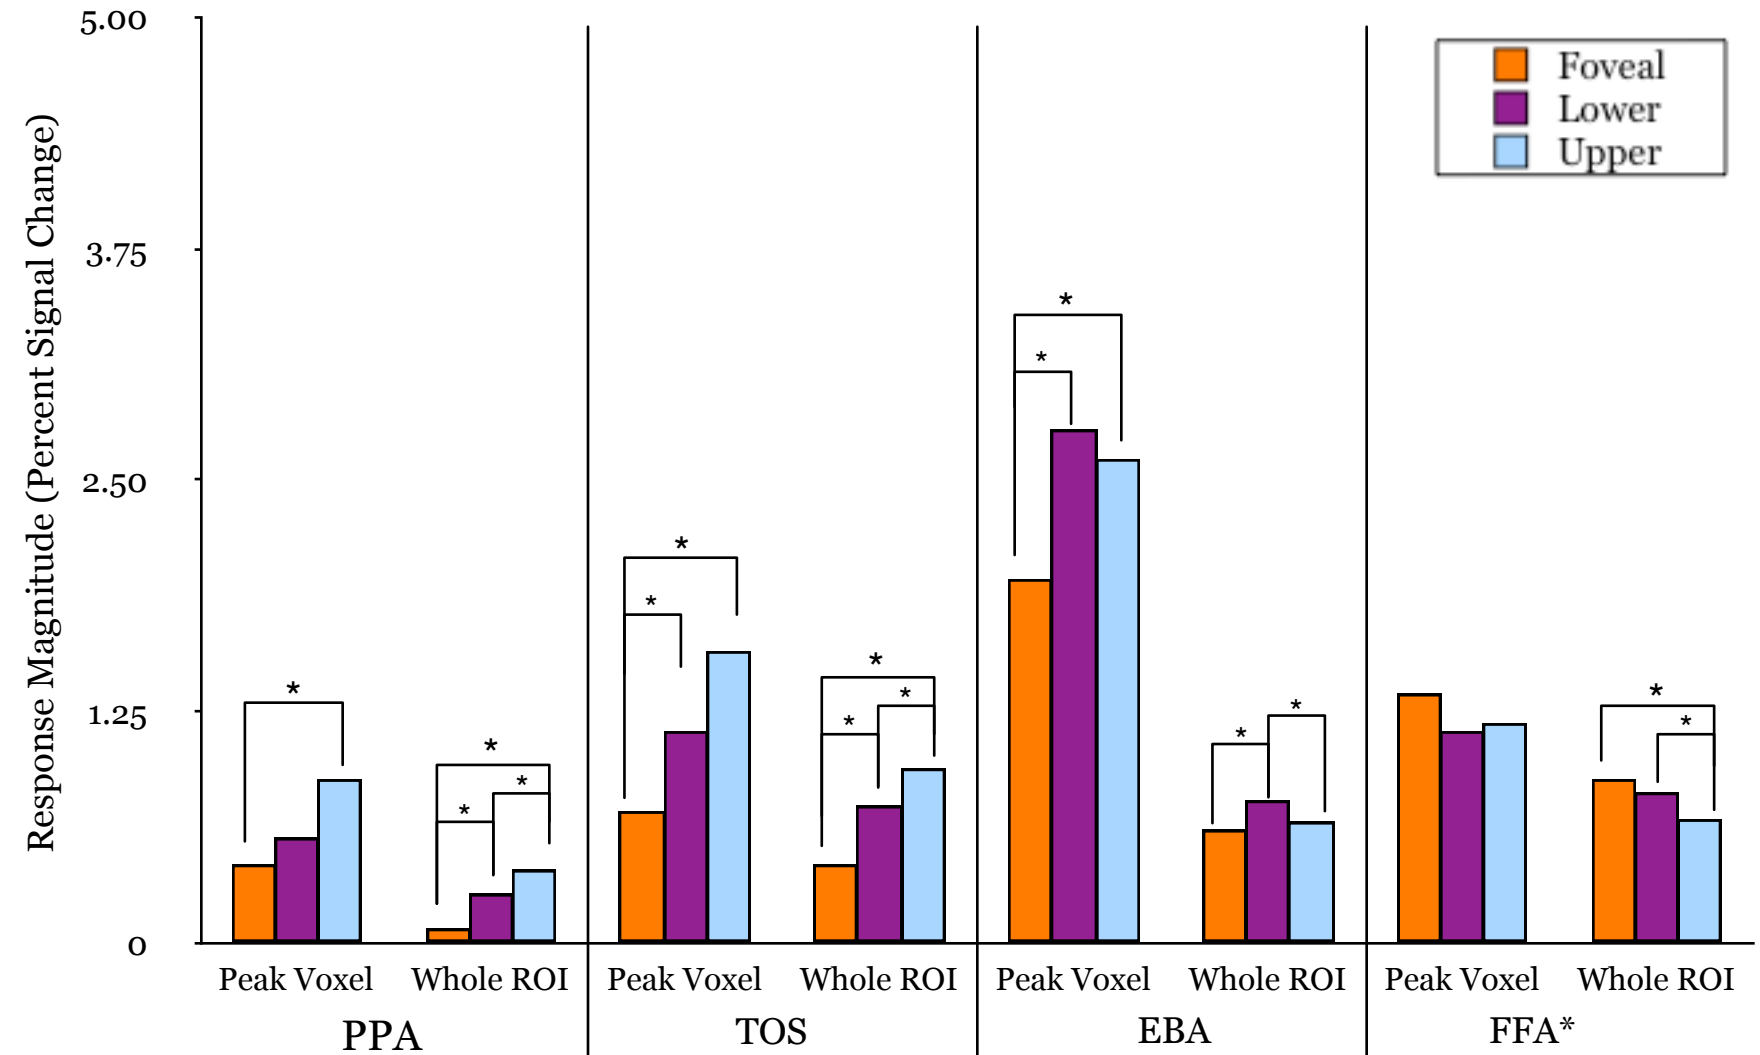

Supplement: pnas_0800431105_2.pdf [file pnas_0800431105_2.pdf]

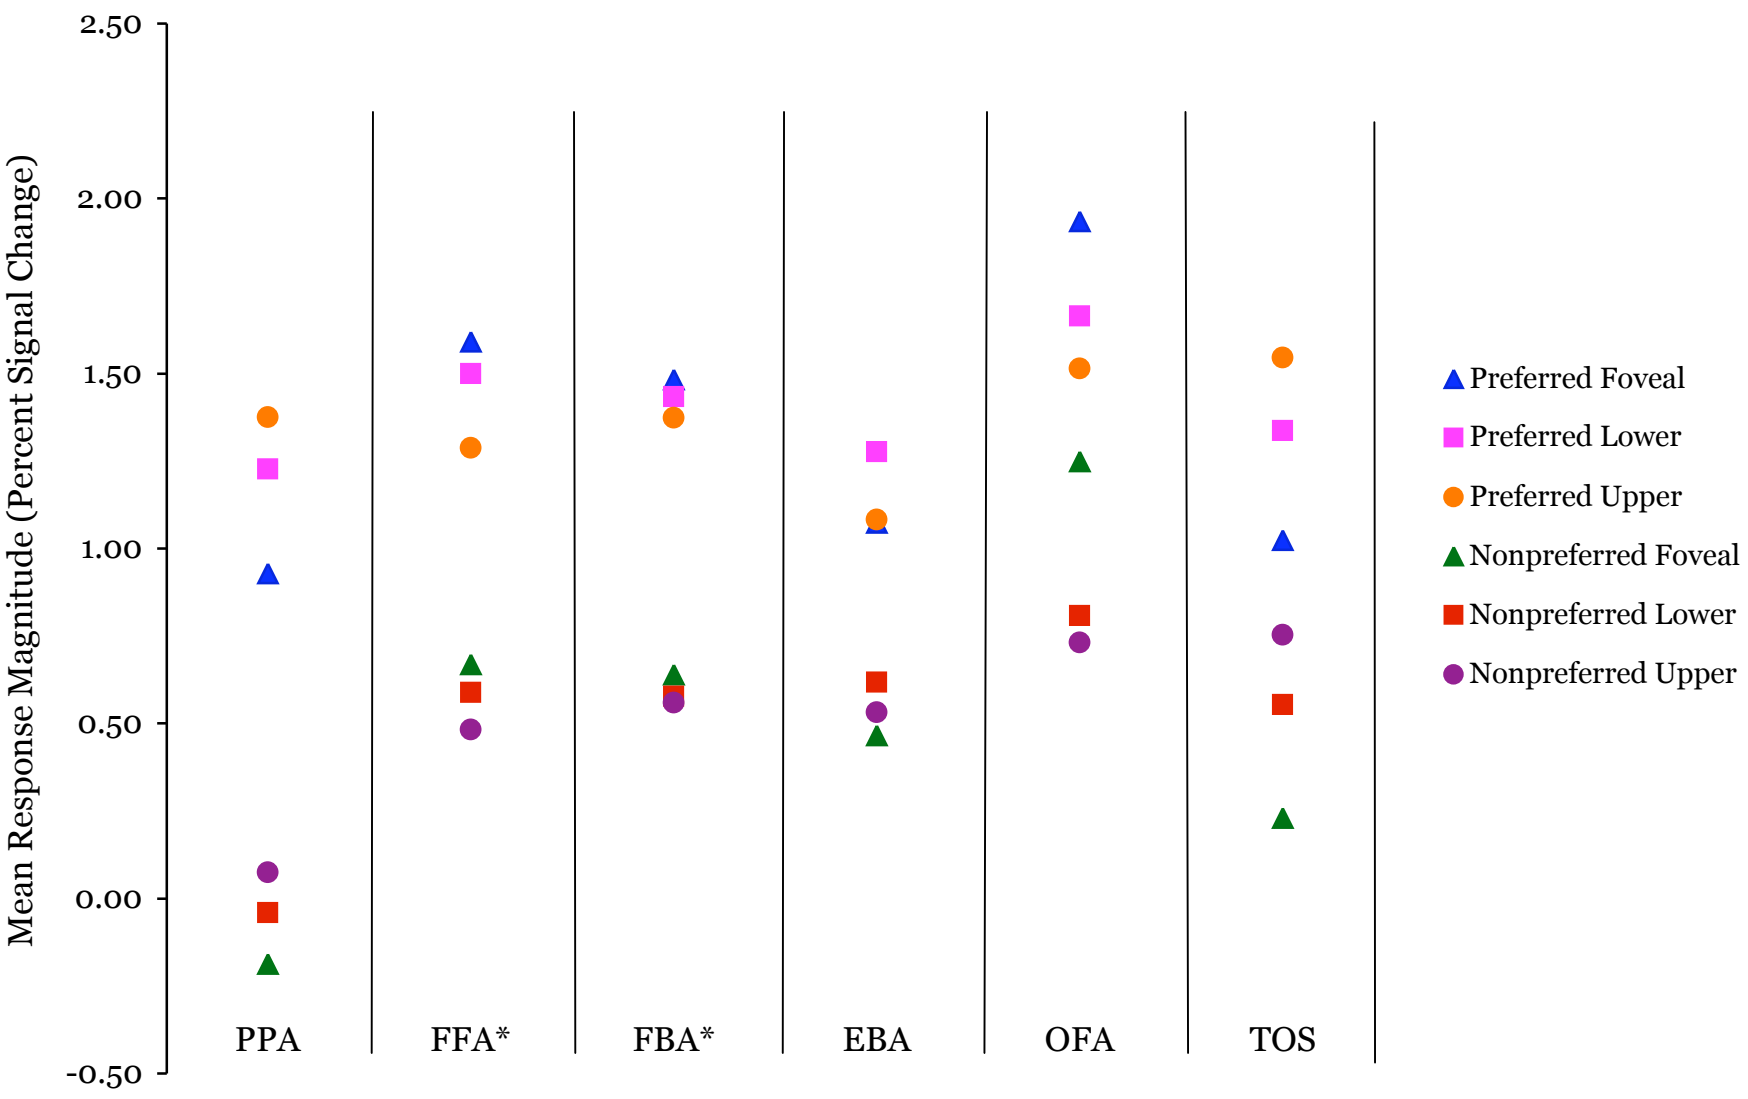

Supplement: pnas_0800431105_3.pdf [file pnas_0800431105_3.pdf]

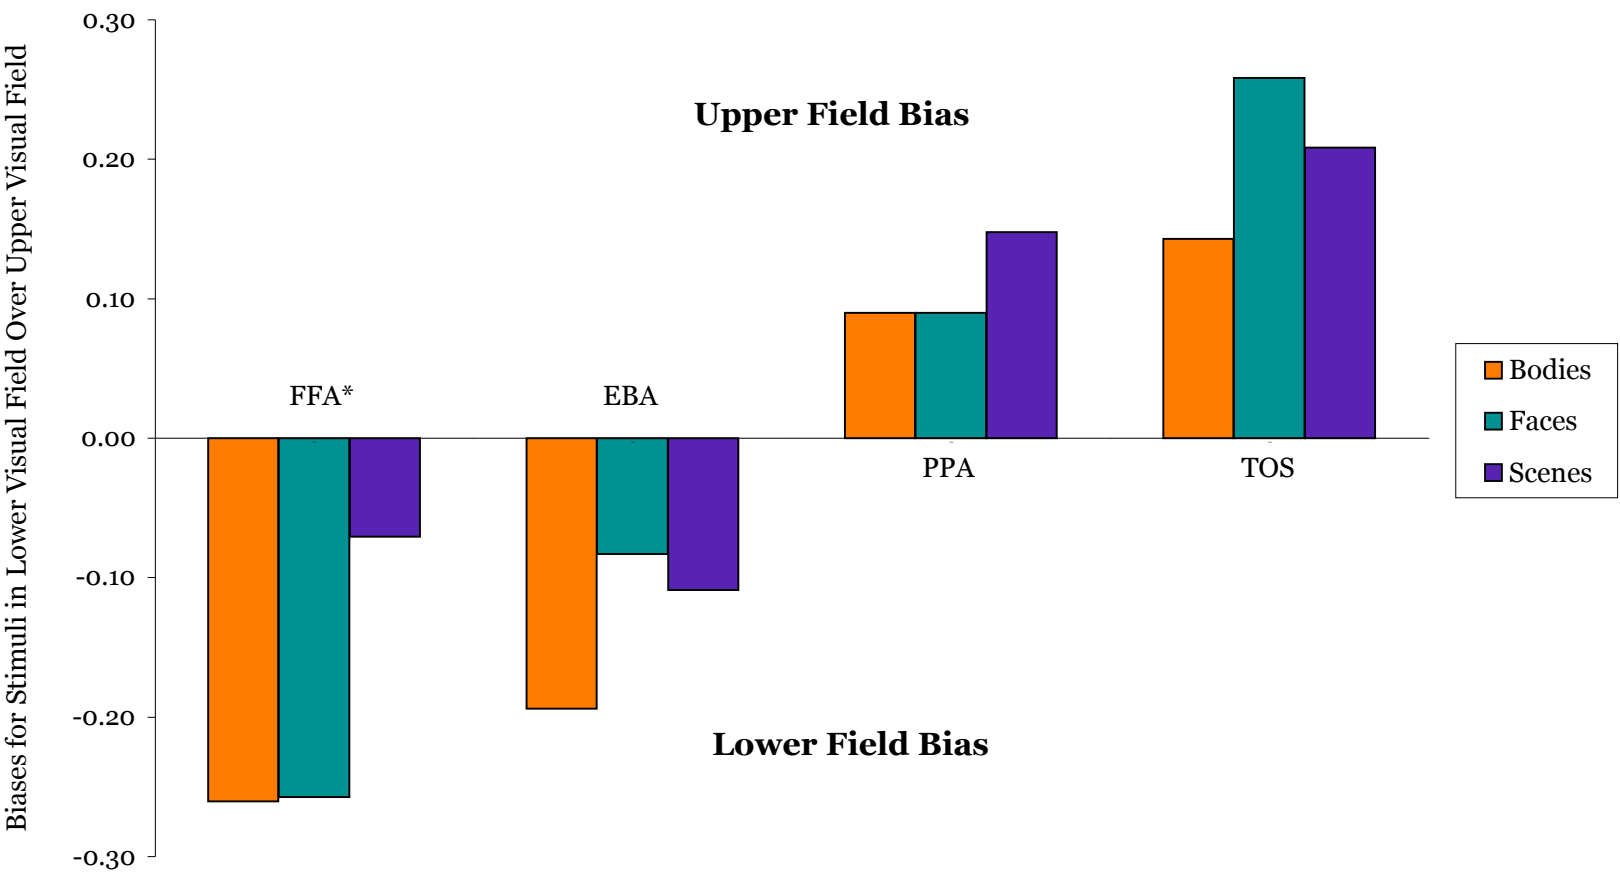

Supplement: pnas_0800431105_4.pdf [file pnas_0800431105_4.pdf]
